# Supplementary material for: Strain Effects on the Electronic and Thermoelectric Properties of n(PbTe)-m(Bi2Te3) System Compounds
Source: MDPI journal article supplement (doi:10.3390/ma14154086), 2021-07-22
Supplement: s1 [file s1]

# Supplementary Materials: Strain effects on the electronic and thermoelectric properties of n(PbTe)-m(Bi<sub>2</sub>Te<sub>3</sub>) system compounds

Weiliang Ma <sup>1,2,†</sup> , Marie-Christine Record <sup>1,†,\*</sup> , Jing Tian <sup>2,†</sup>  and Pascal Boulet <sup>2,†</sup> 

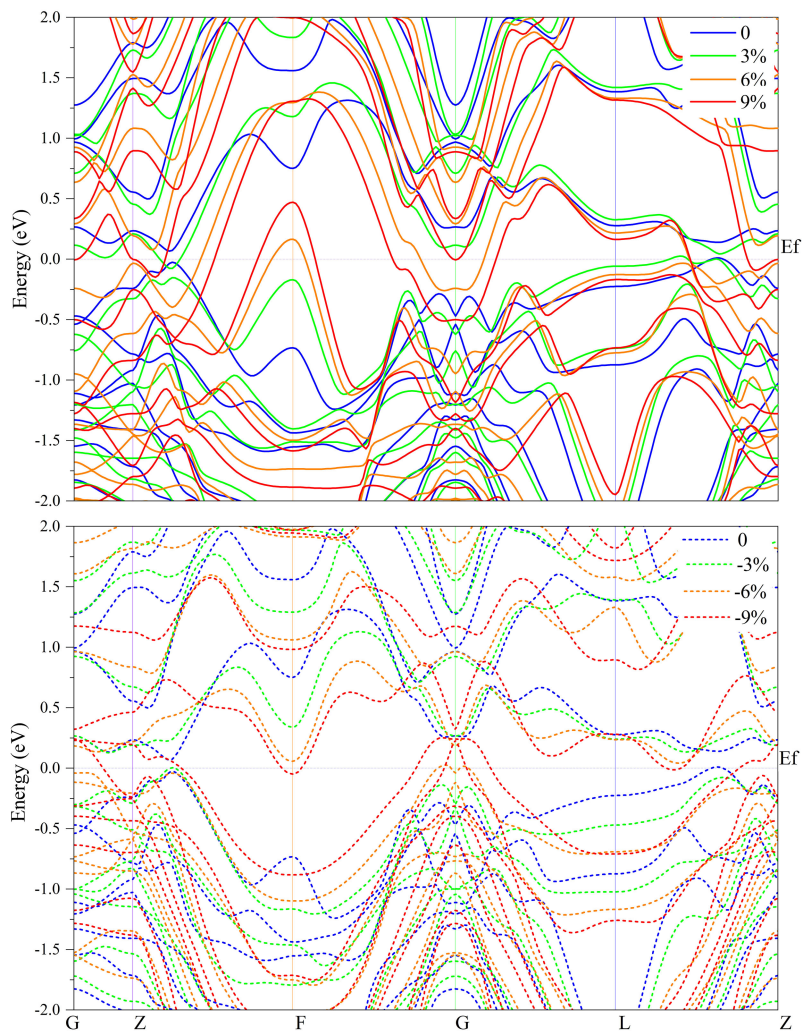

**Figure S1.** Calculated bands structures of Bi<sub>2</sub>Te<sub>3</sub> with PBE functional under strains.

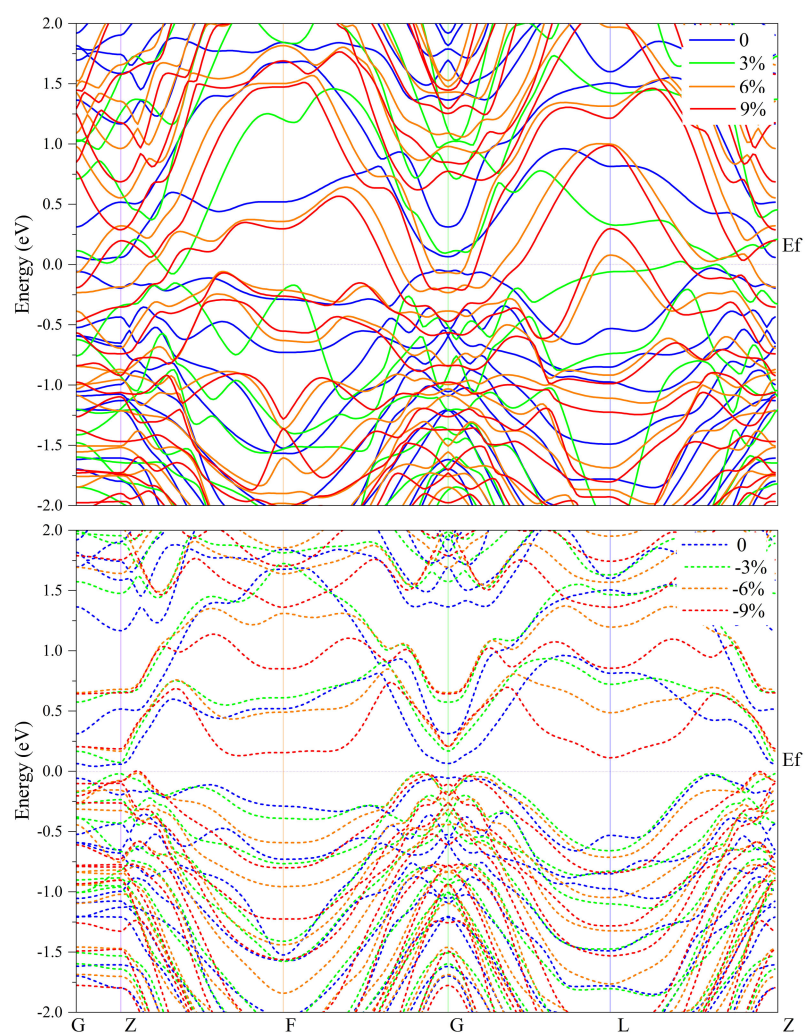

**Figure S2.** Calculated bands structures of  $\text{PbBi}_2\text{Te}_4$  with PBE functional under strains.

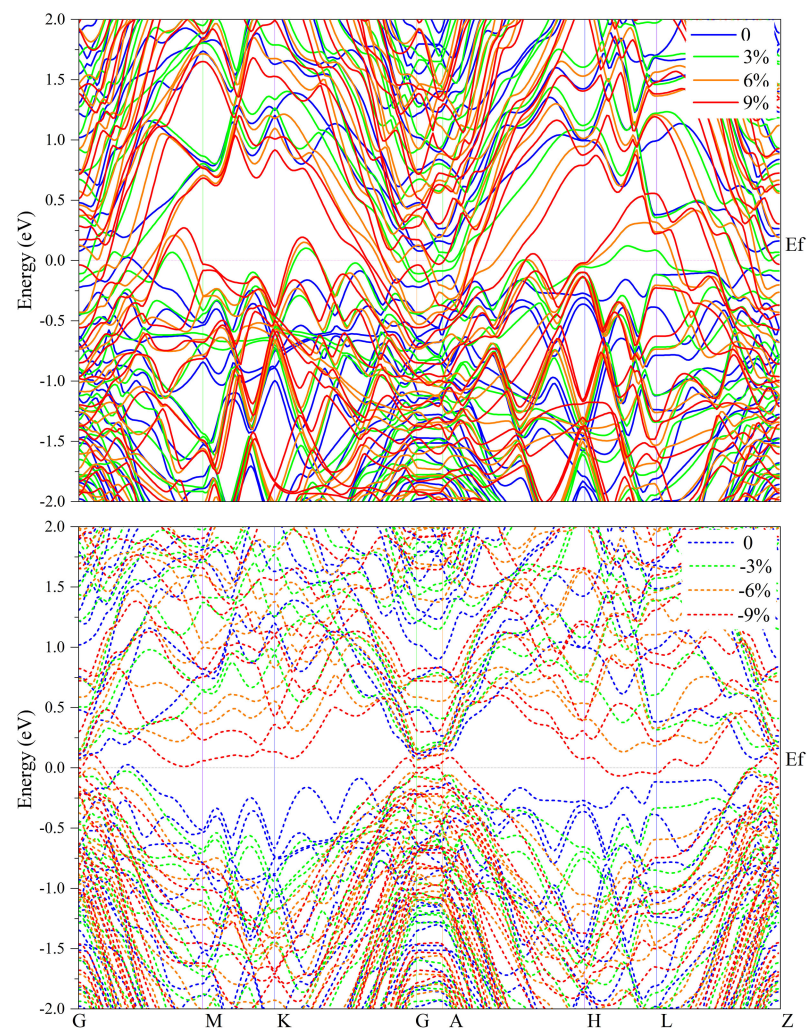

**Figure S3.** Calculated bands structures of  $\text{PbBi}_4\text{Te}_7$  with PBE functional under strains.



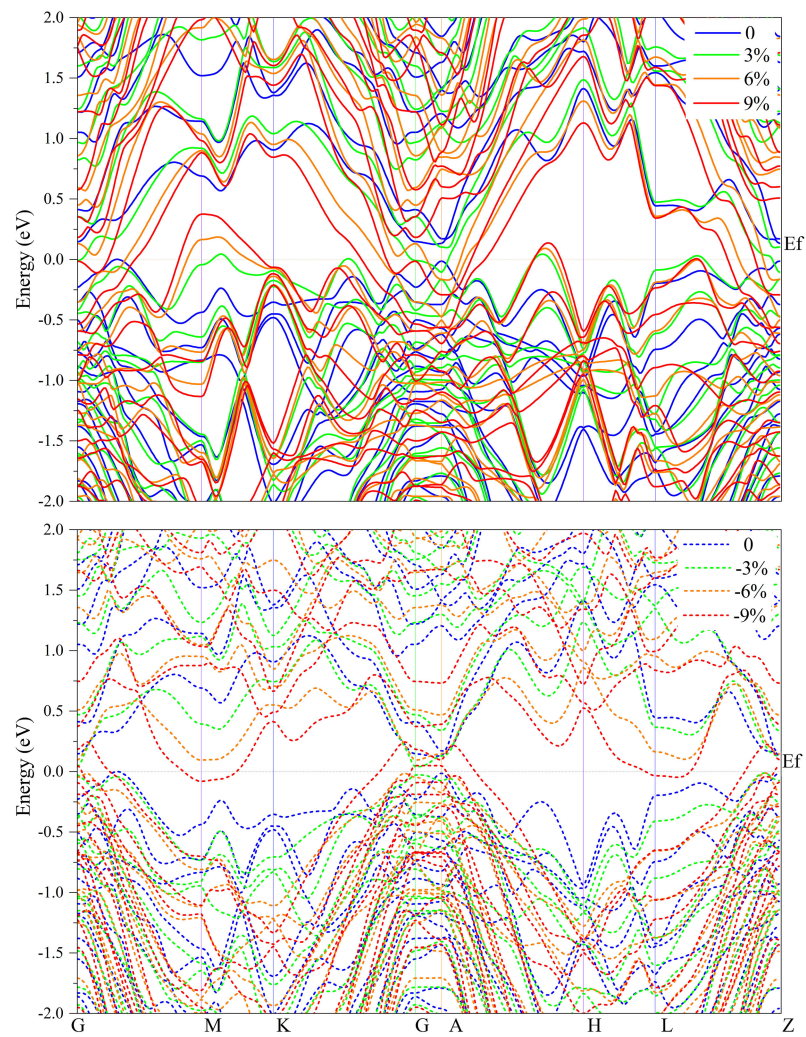

**Figure S4.** Calculated bands structures of  $\text{Pb}_2\text{Bi}_2\text{Te}_5$  with PBE functional under strains.

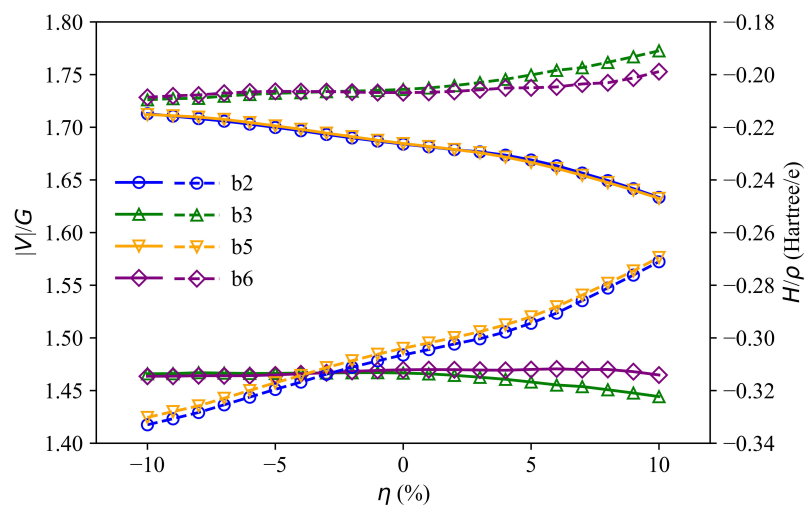

**Figure S5.**  $|V|/G$  (solid lines) and  $\rho$  (dash lines) at various critical points (b2, b3, b4 and b5) for  $\text{PbBi}_4\text{Te}_7$  w.r.t strain. The positions of b2, b3, b4 and b5 are defined in Fig. 8c.



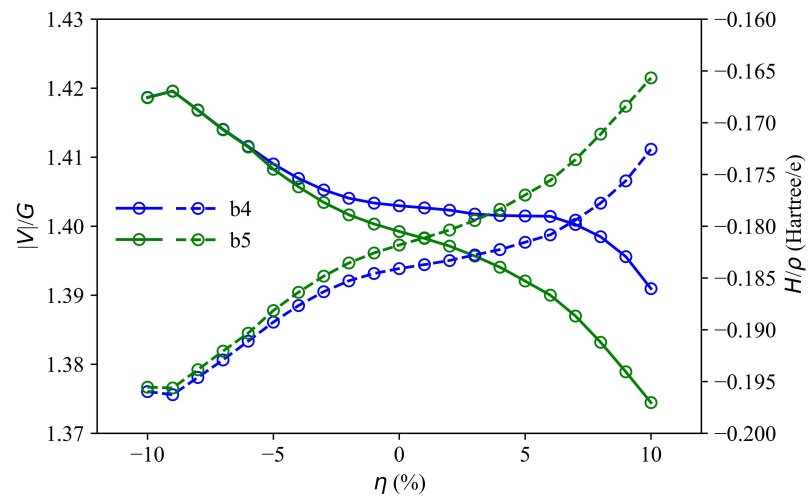

**Figure S6.**  $|V|/G$  (solid lines) and  $\rho$  (dash lines) at various critical points (b4 and b5) for  $\text{Pb}_2\text{Bi}_2\text{Te}_5$  w.r.t strain. The positions of b4 and b5 are defined in Fig. 8d.
