# Supplementary figures and images for: Strain Effects on the Electronic and Thermoelectric Properties of n(PbTe)-m(Bi2Te3) System Compounds
Source: MDPI journal article supplement (doi:10.3390/ma14154086), 2021-07-22

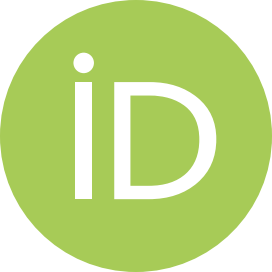

Supplement: s1 [file s1]
